# Supplementary material
Source: publisher figshare collection journal article supplement (https://tandf.figshare.com/ndownloader/files/13175048)
Supplement: Supplementary file 1 [file 13175048]

Supplementary Table 1. Distribution of kidney cancer cases by gender in Estonia, 1995–2014

|  | Men | |  | Women | |  |
| --- | --- | --- | --- | --- | --- | --- |
|  | No | % |  | No | % | p-valueb |
| Totala | 2869 | 100 |  | 2161 | 100 |  |
| Microscopical verification | 2379 | 82.9 |  | 1736 | 80.3 | p=0.019 |
| Age at diagnosis (years) |  |  |  |  |  |  |
| 15–54 | 602 | 21.0 |  | 280 | 13.0 | p<0.001 |
| 55–64 | 819 | 28.6 |  | 492 | 22.8 |  |
| 65–74 | 938 | 32.7 |  | 752 | 34.8 |  |
| ≥75 | 510 | 17.8 |  | 637 | 29.5 |  |
| Morphology |  |  |  |  |  |  |
| Renal cell carcinoma | 2235 | 77.9 |  | 1616 | 74.8 | p=0.035 |
| Other specified | 115 | 4.0 |  | 99 | 4.6 |  |
| NOS | 519 | 18.0 |  | 446 | 20.6 |  |
| TNM stage |  |  |  |  |  |  |
| I/II | 1250 | 43.6 |  | 1070 | 49.5 | p<0.001 |
| III | 419 | 14.6 |  | 282 | 13.1 |  |
| IV | 866 | 30.2 |  | 503 | 23.3 |  |
| Unknown | 334 | 11.6 |  | 306 | 14.2 |  |
| Surgery done | 2150 | 74.9 |  | 1619 | 74.9 | p=0.987 |

a death certificate only and autopsy cases excluded

b chi-square test
